# Supplementary material
Source: PubMed Central journal article supplement (PMC5718323)
Supplement: JCB691783_supplementary_material.pdf [file JCB691783_supplementary_material.pdf]

## Supplementary Material

### *Theoretical Foundation for Data Processing*

The estimations of  $\Delta[\text{HbO}]$ ,  $\Delta[\text{HHb}]$  and  $\Delta[\text{CCO}]$  from raw spectral data taken by the bb-NIRS were performed in MATLAB. First, from the experiments we obtained 15 spectra over the 15 min per person per treatment: 2 pre-TILS baseline readings, 8 TILS readings and 5 recovery readings. The relative optical density,  $\Delta\text{OD}$ , was calculated at each wavelength  $\lambda$  as:

$$\Delta\text{OD}(\lambda) = \log_{10} \left[ \frac{I_0(\lambda)}{I(\lambda)} \right], \quad (1)$$

where  $I_0(\lambda)$  is the average of the 2 initial baseline spectral readings (i.e., the first two spectra collected in each experiment), and  $I(\lambda)$  represents the 13 time-varying spectra (i.e., 8 readings during TILS and 5 readings post-TILS) acquired at each time point.

Based on the Modified Beer-Lambert Law (1), the relationship of  $\Delta\text{OD}(\lambda)$  versus  $\Delta[\text{HbO}]$ ,  $\Delta[\text{HHb}]$  and  $\Delta[\text{CCO}]$  at each  $\lambda$  correspond to a wavelength dependent factor  $L(\lambda)$ . And  $\Delta\text{OD}(\lambda)/L(\lambda)$  could be expressed as a sum of optical absorbance contributed by HbO, HHb and CCO components, as given below (2):

$$\begin{bmatrix} \frac{\Delta\text{OD}(\lambda_1)}{L(\lambda_1)} \\ \frac{\Delta\text{OD}(\lambda_2)}{L(\lambda_2)} \\ \frac{\Delta\text{OD}(\lambda_3)}{L(\lambda_3)} \\ \dots \\ \frac{\Delta\text{OD}(\lambda_n)}{L(\lambda_n)} \end{bmatrix} = \Delta[\text{HbO}]^* \begin{bmatrix} \varepsilon_{\text{HbO}}(\lambda_1) \\ \varepsilon_{\text{HbO}}(\lambda_2) \\ \varepsilon_{\text{HbO}}(\lambda_3) \\ \dots \\ \varepsilon_{\text{HbO}}(\lambda_n) \end{bmatrix} + \Delta[\text{HHb}]^* \begin{bmatrix} \varepsilon_{\text{HHb}}(\lambda_1) \\ \varepsilon_{\text{HHb}}(\lambda_2) \\ \varepsilon_{\text{HHb}}(\lambda_3) \\ \dots \\ \varepsilon_{\text{HHb}}(\lambda_n) \end{bmatrix} + \Delta[\text{CCO}]^* \begin{bmatrix} \varepsilon_{\text{CCO}}(\lambda_1) \\ \varepsilon_{\text{CCO}}(\lambda_2) \\ \varepsilon_{\text{CCO}}(\lambda_3) \\ \dots \\ \varepsilon_{\text{CCO}}(\lambda_n) \end{bmatrix}, \quad (2)$$

where  $\Delta[\text{HbO}]$ ,  $\Delta[\text{HHb}]$  and  $\Delta[\text{CCO}]$  are relative concentration changes of HbO, HHb and CCO respectively;  $\varepsilon_{\text{HbO}}(\lambda)$ ,  $\varepsilon_{\text{HHb}}(\lambda)$  and  $\varepsilon_{\text{CCO}}(\lambda)$  represent the extinction coefficients at each wavelength of HbO, HHb and CCO, which can be found in ref. (3);  $L(\lambda)$  is a wavelength dependent factor that denotes the effective pathlength of the detected photons through tissues at each wavelength. Furthermore, according to the Modified Beer-Lambert Law (1, 4),  $L(\lambda)$  can be further expressed as:

$$\begin{bmatrix} L(\lambda_1) \\ L(\lambda_2) \\ L(\lambda_3) \\ \dots \\ L(\lambda_n) \end{bmatrix} = r * \begin{bmatrix} DPF(\lambda_1) \\ DPF(\lambda_2) \\ DPF(\lambda_3) \\ \dots \\ DPF(\lambda_n) \end{bmatrix}, \quad (3)$$

where  $r$  is a constant that denotes the source-detector distance. In this study, we used source detector separation of 3 cm, so  $r=3$ . The wavelength dependence of  $L(\lambda)$  is caused by a wavelength-dependent differential pathlength factor,  $DPF(\lambda)$ . Note that in this study, we regard  $DPF$  as a wavelength dependent vector rather than a constant across the wavelength range. By substituting Eq. (3) into Eq. (2) for multiple wavelengths, the estimation of  $\Delta[\text{HbO}]$ ,  $\Delta[\text{HHb}]$  and  $\Delta[\text{CCO}]$  can be expressed in a matrix format as follows:

$$\begin{bmatrix} \Delta[\text{HbO}] \\ \Delta[\text{HHb}] \\ \Delta[\text{CCO}] \end{bmatrix} = \frac{1}{r} * \begin{bmatrix} \varepsilon_{\text{HbO}}(\lambda_1) & \varepsilon_{\text{HHb}}(\lambda_1) & \varepsilon_{\text{CCO}}(\lambda_1) \\ \varepsilon_{\text{HbO}}(\lambda_2) & \varepsilon_{\text{HHb}}(\lambda_2) & \varepsilon_{\text{CCO}}(\lambda_2) \\ \dots & \dots & \dots \\ \varepsilon_{\text{HbO}}(\lambda_n) & \varepsilon_{\text{HHb}}(\lambda_n) & \varepsilon_{\text{CCO}}(\lambda_n) \end{bmatrix}^{-1} \begin{bmatrix} \frac{\Delta OD(\lambda_1)}{DPF(\lambda_1)} \\ \frac{\Delta OD(\lambda_2)}{DPF(\lambda_2)} \\ \dots \\ \frac{\Delta OD(\lambda_n)}{DPF(\lambda_n)} \end{bmatrix}. \quad (4)$$

In order to accurately solve  $\Delta[\text{HbO}]$ ,  $\Delta[\text{HHb}]$  and  $\Delta[\text{CCO}]$  using Eq. (4), we would need to know  $\text{DPF}(\lambda)$  in the wavelength range of our measurements. It is known that appropriate or accurate selection/estimation of wavelength-dependent DPF is crucial for accurate estimation of chromophore concentrations (5). In this study,  $\text{DPF}(\lambda)$  values were assumed to be time-invariant because of given stable brain optical properties. Based on diffusion theory with the semi-infinite boundary geometry (6),  $\text{DPF}(\lambda)$  can be determined by

$$\text{DPF}(\lambda) = \frac{\sqrt{3\mu_s'(\lambda)}}{2\sqrt{\mu_a(\lambda)}} * \frac{r\sqrt{3\mu_a(\lambda)\mu_s'(\lambda)}}{r\sqrt{3\mu_a(\lambda)\mu_s'(\lambda)} + 1} \quad (5)$$

where  $\mu_a(\lambda)$  and  $\mu_s'(\lambda)$  are the estimated absorption and reduced scattering coefficients across the wavelength range of interest. The following steps list sequential procedures for quantifying  $\mu_a(\lambda)$  and  $\mu_s'(\lambda)$  of the human forehead across all the subjects.

- (1) In the beginning of each experiment, each subject's right forehead was measured with a frequency-domain OxiplexTS tissue oximeter, which could provide absolute concentrations of [HbO] and [HHb] at the measurement site as well as absolute values of  $\mu_a$  and  $\mu_s'$  at 750, 785, 811, and 830 nm.
- (2) The measured concentrations of [HbO] and [HHb] were multiplied by wavelength-dependent extinction coefficients,  $\epsilon_{\text{HbO}}(\lambda)$  and  $\epsilon_{\text{HHb}}(\lambda)$ , respectively, in the spectral range of 740-900 nm. This operation would generate a spectrum of absorption coefficient across 740-900 nm, based on  $\mu_a(\lambda) = \epsilon_{\text{HbO}}(\lambda)[\text{HbO}] + \epsilon_{\text{HHb}}(\lambda) [\text{HHb}]$ .
- (3) In the meantime, according to Mie Theory (7), light scattering coefficients across 740-900 nm can be expressed by  $\mu_s'(\lambda) = k\lambda^{-b}$ , where  $k$  and  $b$  are constants that are associated with the size and density of light scatterers. In this study,  $k$  and  $b$  were obtained by fitting this equation to the four measured  $\mu_s'$  values at 750, 785, 811, and 830 nm in step (1).

(4) We then interpolated and extrapolated the  $\mu_s'(\lambda)$  values in 740-900 nm by  $\mu_s'(\lambda)=k\lambda^{-b}$ .

(5) Then, by substituting the quantified  $\mu_a(\lambda)$  and  $\mu_s'(\lambda)$  values across 740-900 nm back into Eq. (5), we were able to obtain DPF( $\lambda$ ) of the subject's forehead within 740-900 nm for further data processing.

Next, a multiple linear regression analysis was implemented in 740-900 nm (with a total of 161 wavelengths) to fit for  $\Delta[\text{HbO}]$ ,  $\Delta[\text{HHb}]$  and  $\Delta[\text{CCO}]$  based on Eq. 4 using a MATLAB-based function.

### References:

1. Kocsis L, Herman P, Eke A. The modified Beer-Lambert law revisited. *Phys Med Biol.* 2006;51(5):N91-8.
2. Wang X, Tian F, Soni SS, Gonzalez-Lima F, Liu H. Interplay between up-regulation of cytochrome-c-oxidase and hemoglobin oxygenation induced by near-infrared laser. *Sci Rep.* 2016;6:30540.
3. Kolyva C, Tachtsidis I, Ghosh A, Moroz T, Cooper CE, Smith M, et al. Systematic investigation of changes in oxidized cerebral cytochrome c oxidase concentration during frontal lobe activation in healthy adults. *Biomed Opt Express.* 2012;3(10):2550-66.
4. Scholkmann F, Kleiser S, Metz AJ, Zimmermann R, Mata Pavia J, Wolf U, et al. A review on continuous wave functional near-infrared spectroscopy and imaging instrumentation and methodology. *NeuroImage.* 2014;85 Pt 1:6-27.
5. Matcher SJ, Cope M, Delpy DT. Use of the water absorption spectrum to quantify tissue chromophore concentration changes in near-infrared spectroscopy. *Phys Med Biol.* 1994;39(1):177-96.
6. Fantini S, Hueber D, Franceschini MA, Gratton E, Rosenfeld W, Stubblefield PG, et al. Non-invasive optical monitoring of the newborn piglet brain using continuous-wave and frequency-domain spectroscopy. *Phys Med Biol.* 1999;44(6):1543-63.
7. van Staveren HJ, Moes CJ, van Marie J, Prahl SA, van Gemert MJ. Light scattering in Intralipid-10% in the wavelength range of 400-1100 nm. *Appl Opt.* 1991;30(31):4507-14.
